# Supplementary material for: A thermally reversible injectable adhesive for intestinal tissue repair and anti-postoperative adhesion
Source: Royal Society of Chemistry journal article supplement (doi:10.1039/d4bm00164h), 2024-01-01
Supplement: d4bm00164h1.pdf [file d4bm00164h1.pdf]

## Supporting Information

### **A thermally reversible injectable adhesive for intestine tissue repair and anti-postoperative adhesion**

Wenmo Zhang<sup>a,†</sup>, Runze Zhang<sup>c,†</sup>, Rong Yang<sup>a</sup>, Yage Sun<sup>a</sup>, Qian Zhang<sup>a</sup>, Xuequan Feng<sup>b\*</sup>, Chunyan Cui<sup>a,d\*</sup> and Wenguang Liu<sup>a\*</sup>

<sup>a</sup>School of Material Science and Engineering, Tianjin Key Laboratory of Composite and Functional Materials, Tianjin University, Tianjin 300350, China

<sup>b</sup>Tianjin First Center Hospital, Tianjin 300192, China

<sup>c</sup>NHC Key Laboratory of Critical Care Medicine, Department of Neurosurgery, Binhai Hospital of Tianjin Medical University General Hospital, Tianjin 300480, China

<sup>d</sup>State Key Laboratory of Molecular Engineering of Polymers (Fudan University)

<sup>†</sup>These authors contributed equally to this work

\*Corresponding author (E-mail: fengxuequan@126.com, cycui@tju.edu.cn, wgliu@tju.edu.cn)

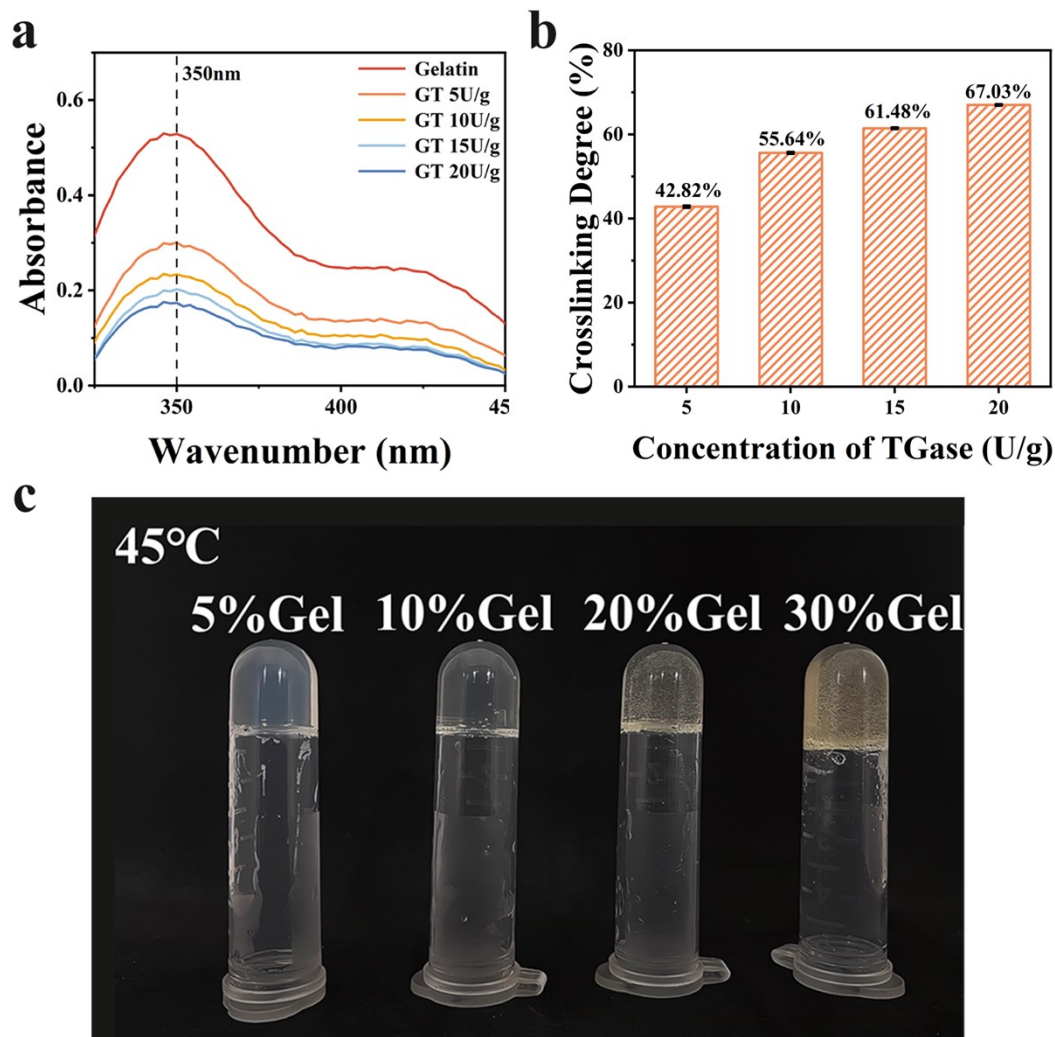

**Fig. S1** (a) Absorbance of the mixed solutions of gelatin and different concentrations of TGase. (b) Calculation results of crosslinking degree of gelatin after mixed with different concentration of TGase. (c) Gelatin-TGase hydrogel with different concentration of gelatin at 45 °C.

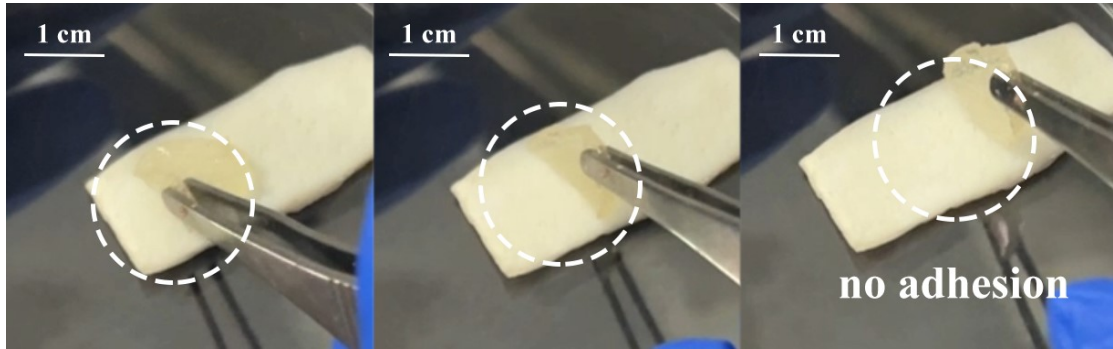

**Fig. S2** Photos showing that Gelatin -TGase hydrogel has no tissue adhesion at 37 °C.

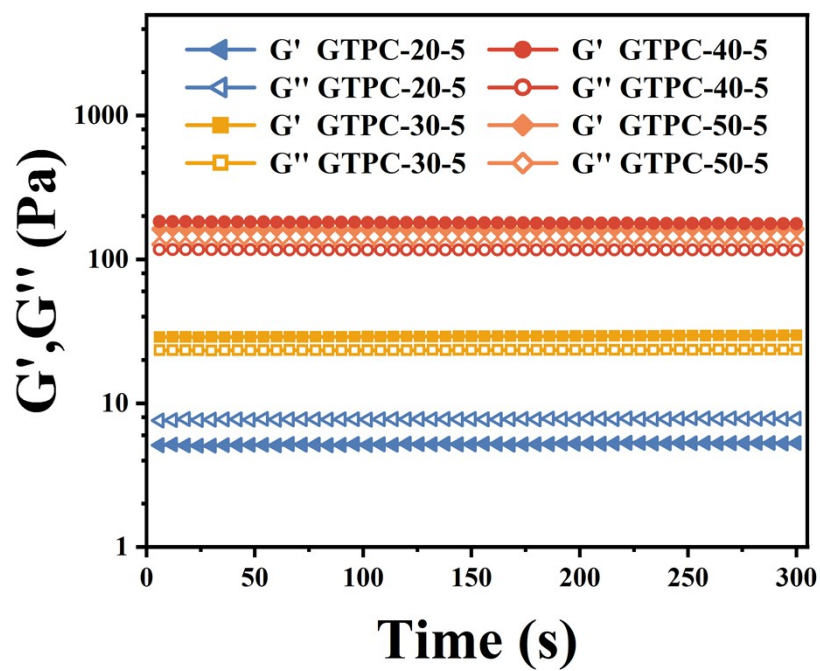

**Fig. S3** Time sweep rheological analysis to evaluate stability of GTPC hydrogels with different gelatin concentration at 37 °C.

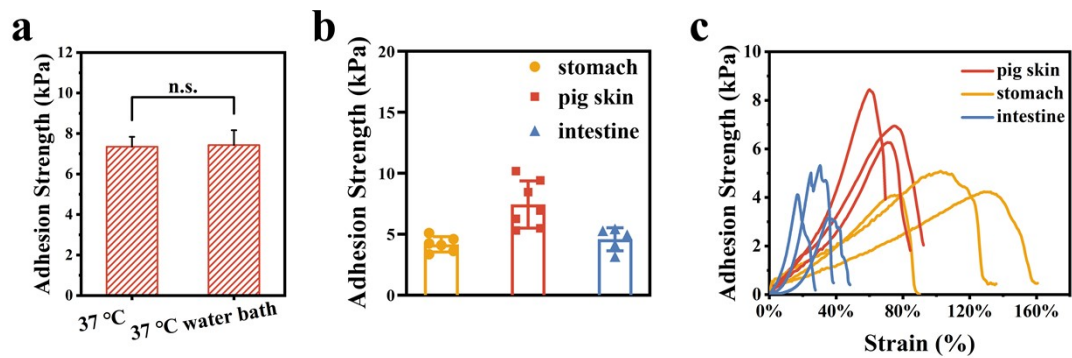

**Fig. S4** (a) Adhesive strength of the GTPC hydrogel to pig skin in air and water at 37 °C. Adhesion strength (b) and lap shear curves (c) of GTPC hydrogel to different tissues.

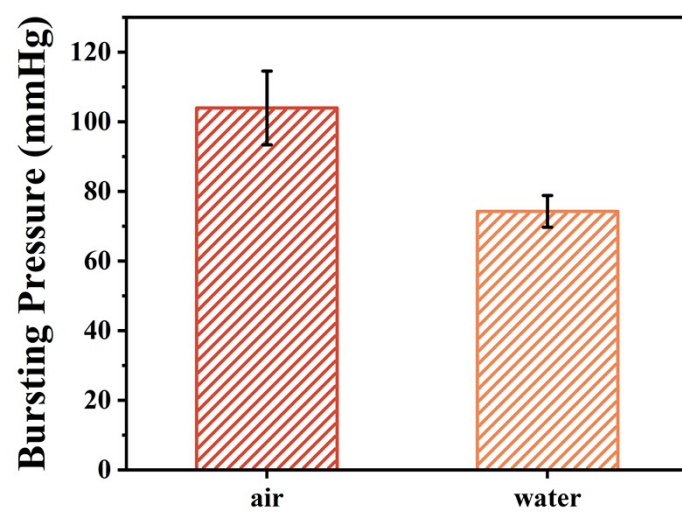

**Fig. S5** Bursting pressure of the GTPC hydrogel to intestine tissue in air and water, respectively.

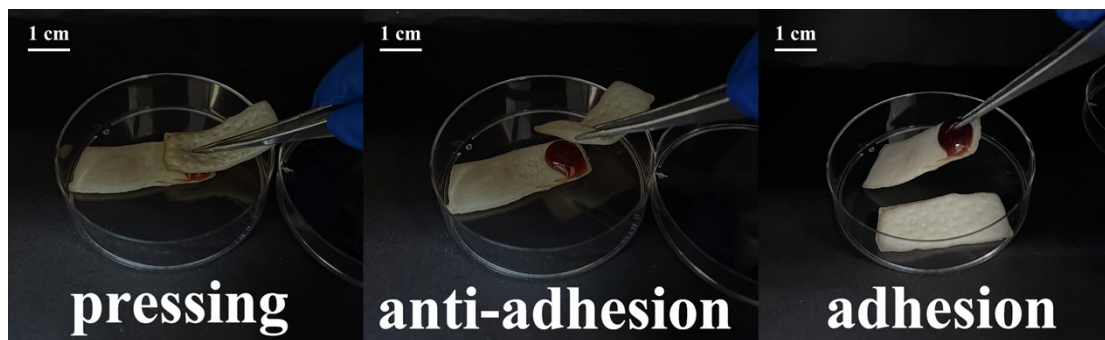

**Fig. S6** Photographs of the asymmetric adhesion property of GTPC hydrogel.

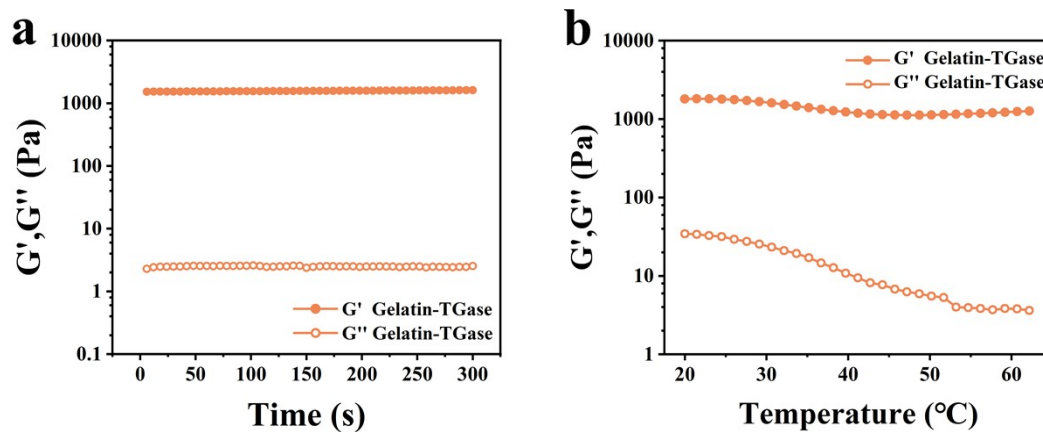

**Fig. S7** (a) Time sweep rheological analysis to evaluate the stability of gelatin hydrogel crosslinked with TGase at 45 °C. (b) Temperature sweep rheological analysis to evaluate the stability of gelatin hydrogel crosslinked with TGase at different temperature.



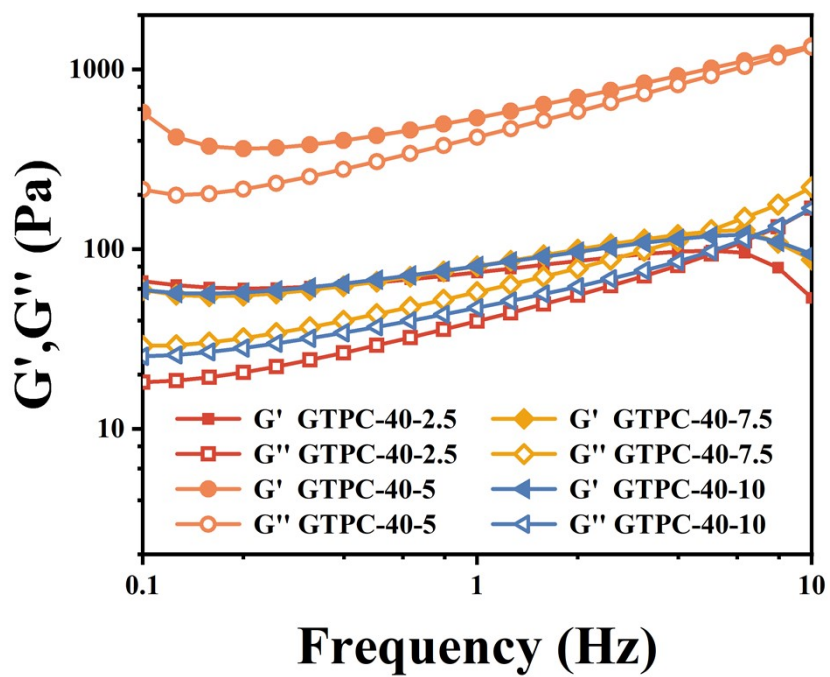

**Fig. S8** Frequency sweep (37 °C) of GTPC hydrogels with different PC concentration.

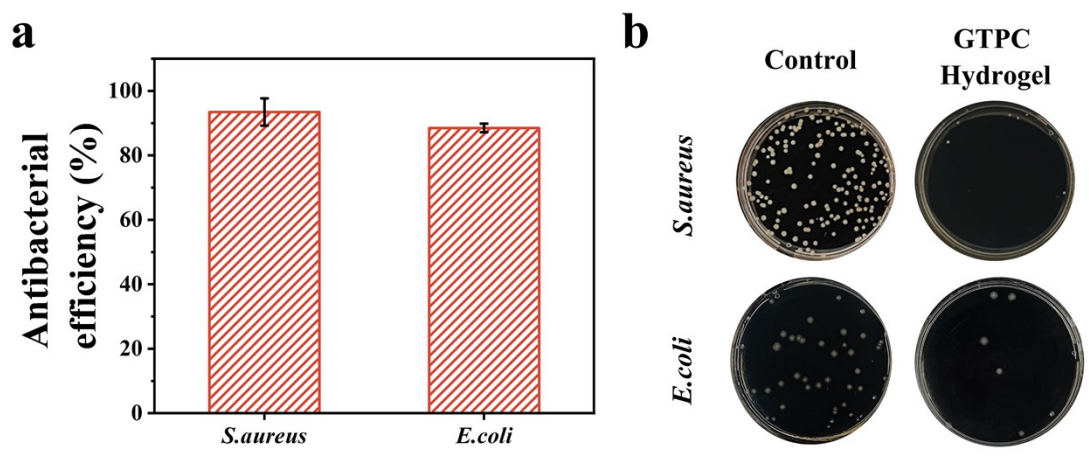

**Fig. S9** (a) Antibacterial efficiency for *S. aureus* and *E. coli* of GTPC hydrogel.

(b) Images of bacterial cultures in control and experimental groups.

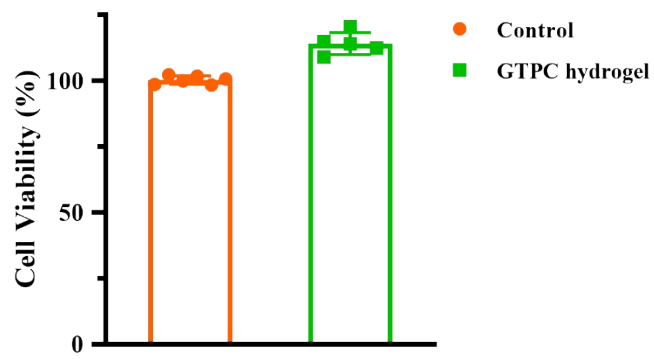

**Fig. S10** In vitro cytocompatibility of the GTPC hydrogel.

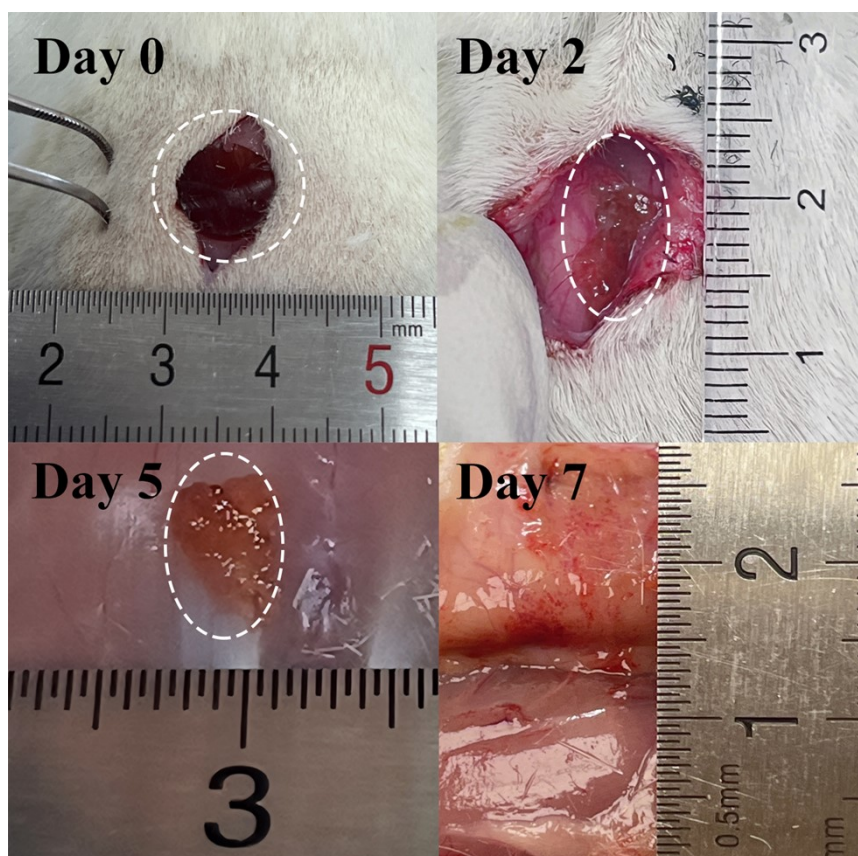

**Fig. S11** Degradation of the GTPC hydrogels at different time points in vivo. White circle denotes the location of the hydrogel.

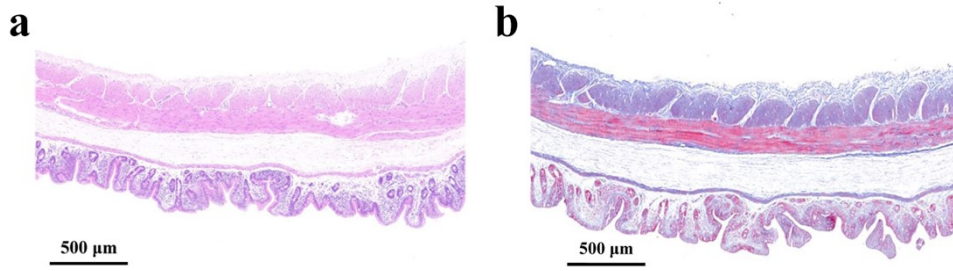

**Fig. S12** (a) H&E and (b) Masson staining histological images of normal cecal wall.

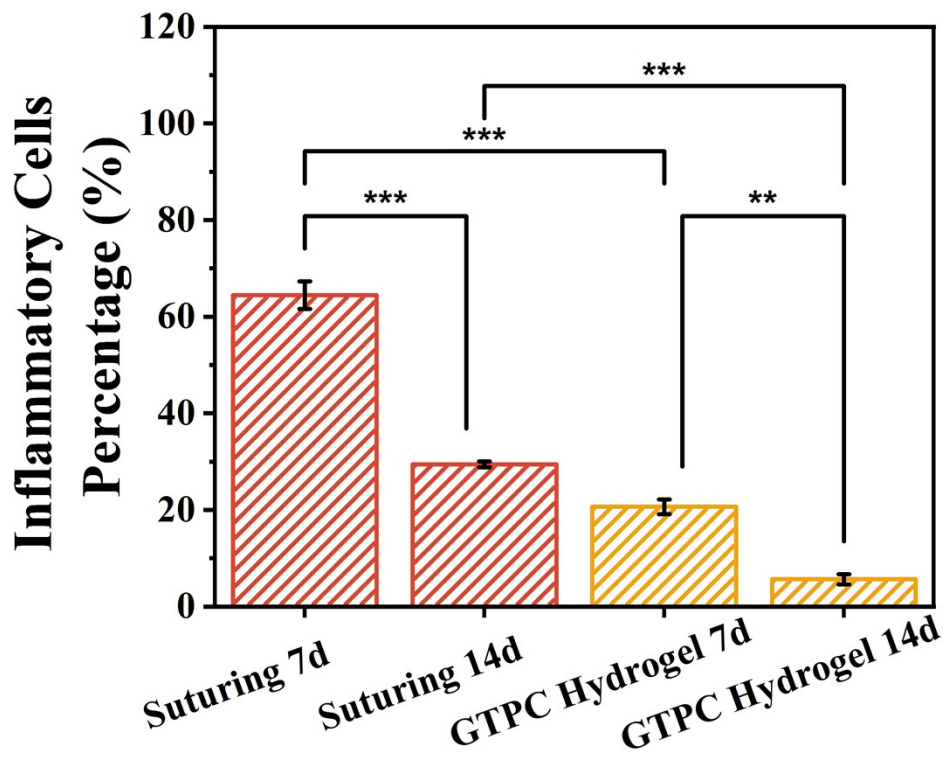

**Fig. S13** Quantitative analysis of the percentage of inflammatory cells in all cells at the cecal damaged site after 7 or 14-day treatment using surgical suture or GTPC hydrogel (\*\* $p < 0.01$ , \*\*\* $p < 0.001$ ).

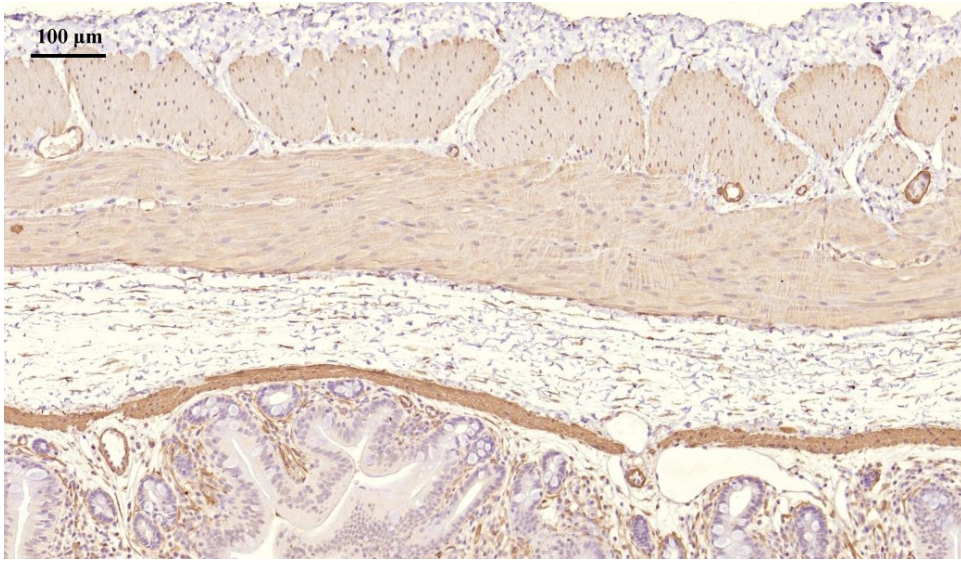

**Fig. S14**  $\alpha$ -SMA protein immunohistochemical staining image of normal cecal wall.
